# Supplementary material for: Study on the persistence of Zika virus (ZIKV) in body fluids of patients with ZIKV infection in Brazil
Source: Springer Nature journal article supplement (doi:10.1186/s12879-018-2965-4), 2018-01-22
Supplement: MOESM3 [file 15406428]

## Enrollment questionnaire - Male

Site ID: 

(1 = Rio, 2 = Manaus, 3 = Recife)

Unique participant ID:

Participant type: 

(1 = Index, 2 = Contact symptomatic, 3 = Contact asymptomatic)

GAL number:

If Contact, number of Index

## RECRUITMENT INFORMATION

1. a) Date of screening:

| Day                  | Month                | Year                 |
|----------------------|----------------------|----------------------|
| <input type="text"/> | <input type="text"/> | <input type="text"/> |

b) Screened by (nurse name):

Initials

1 = No

2 = Yes

2. a) Consent for enrolment:

b) Consent for follow up of household members:

## ZIKA SYMPTOMS

1 = No

2 = Yes

3. Zika symptoms

a) Temperature

°C  

e) Conjunctivitis

b) Rash

f) Pruritus

c) Myalgia

g) Peri-auricular edema

d) Arthralgia

***Thank you for participating in the study. I will be conducting your interview today and it will last around 60 minutes. I ask all participants in this study the same questions. All of your answers are confidential. I will mark a response to every question. It is ok to say "I prefer not to answer" at any time and we will move on to the next question. You can also ask me to go back, or repeat any questions. I would like to remind you that your participation in the study is completely confidential. Are you comfortable to proceed with the interview now?***

***I would like to ask you some questions about your home and some items within your home. When answering the questions, please, consider only items which are working, including those kept but not used. If they are not working, consider only those that you have intention to fix over the next 6 months.***

4. Are you living alone or with other people?

1 = Alone

2 = Other people

5. Can you, please, choose the option that best describes your household?

1 = Live alone

2 = Couple with children under 16 years

3 = Couple with children over 16 years

4 = No partner with children under 16 years

5 = No partner with children over 16 years

6 = No partner with children under and over 16 years

7 = No partner, no children, with relatives

8 = No partner, no children, with aggregates

9 = Couple without children

10 = Couple without children with relatives

## Enrollment questionnaire - Male

Site ID: Unique participant ID: 6. How many people live in your house, including yourself? 7. Are you the head of the family? 

1 = No

9 = Refused

2 = Yes

8. What is your main source of income? 

1 = Employed with monthly salary

6 = Retired for time of work

2 = Temporary employed with salary

7 = Unemployed

3 = Self employed

8 = Another source

4 = On benefit due to illness

9 = Refused

5 = Retired due to illness

9. Your residence is: 

1 = Owned by you

2 = Rented

3 = Lended

10. Considering the part of the street where you live you would say that it is: 

1 = Paved/asphalted

9 = Refused

2 = Gravel

11. What is your main source of water? 

1 = Internal pipes

4 = Piped water outside your home

1 = No pipes

5 = Other source

3 = No water service

8 = Don't know

4 = Well

9 = Refused

If **Other**, specify: \_\_\_\_\_12. How is the waste collected from your house? 

1 = Directly

8 = Don't know

1 = No service

9 = Refused

*Please report how many of the following apply to you situation, using the codes here under*

0 = 0

1 = 1

2 = 2

3 = 3

4 = 4

5 = 5 or more

9 = Refused

13. Bathrooms in your home? 14. Servents working in your home? 15. Cars you own? (This does not include taxi or cars for commercial use) 16. Motorbikes you own? (This does not include motorbike for professional use) 17. Computers you have in your home? 18. Dish washers you have in your home?

## Enrollment questionnaire - Male

Site ID: Unique participant ID: 19. Washing machines you have in your home? 20. Tumble dryers you have in your home? 21. Fridges you have in your home? 22. Freezers you have in your home? (Standalone or as part of the fridge) 23. DVD players you have in your home? (This does not include your car's DVD) 24. Microwaves oven you have in your home? 

## EPIDEMIOLOGICAL DATA

*Next I would like to ask you about history of travel and your current symptoms.*25. a) Have you travelled in the previous 30 days? 

1 = No      2 = Yes      9 = Refused

b) How many times have you travelled in the previous 30 days? 

1 = 1      2 = 2      3 = 3      4 = 4      5 = 5 or more      9 = Refused

c) Date you started your last travel:

| Day                  | Month                | Year                 |
|----------------------|----------------------|----------------------|
| <input type="text"/> | <input type="text"/> | <input type="text"/> |

d) Date you returned from your last travel:

| Day                  | Month                | Year                 |
|----------------------|----------------------|----------------------|
| <input type="text"/> | <input type="text"/> | <input type="text"/> |

e) Destination of your last travel: \_\_\_\_\_

f) Date of previous travels in the last 30 days (more recent travel first)

1

| Day                  | Month                | Year                 |
|----------------------|----------------------|----------------------|
| <input type="text"/> | <input type="text"/> | <input type="text"/> |

2

| Day                  | Month                | Year                 |
|----------------------|----------------------|----------------------|
| <input type="text"/> | <input type="text"/> | <input type="text"/> |

3

| Day                  | Month                | Year                 |
|----------------------|----------------------|----------------------|
| <input type="text"/> | <input type="text"/> | <input type="text"/> |

g) Date you returned from your previous travels in the last 30 days (more recent travel first)

1

| Day                  | Month                | Year                 |
|----------------------|----------------------|----------------------|
| <input type="text"/> | <input type="text"/> | <input type="text"/> |

2

| Day                  | Month                | Year                 |
|----------------------|----------------------|----------------------|
| <input type="text"/> | <input type="text"/> | <input type="text"/> |

3

| Day                  | Month                | Year                 |
|----------------------|----------------------|----------------------|
| <input type="text"/> | <input type="text"/> | <input type="text"/> |

h) Destination of your previous travel in the last 30 days (more recent first):

1 \_\_\_\_\_

2 \_\_\_\_\_

3

## Enrollment questionnaire - Male

Site ID: Unique participant ID: 26. a) Do you know anyone else presenting two or more of the following symptoms? 

(Rash, fever, joint pain, muscle pain, pruritus, conjunctivitis -red eyes, headache)

1 = No

8 = don't know

2 = Yes

9 = Refused

If **No**, **Don't know** or **Refused**, Go to **Q28**b) If **Yes**, where are they from, who are they and how many?

Where are they from?

1 = No 2 = Yes

If **Yes**, How many are they?1. Home 2. Partner 3. Neighbour 4. Work 

27. Could you, please, tell me who are these persons and the timing of their symptoms in relation to yours? (Nurses should capture information on sexual partners, siblings, children)

*If participant refuses to specify, write "Refused" under relationship*

Relationship

1 = Yes

2 = No

Did this person have Zika before or after you?

1 = Before case

2 = After case

9 = Refused

a) Husband b) Wife c) Sexual partner d) Father e) Mother f) Brother g) Sister h) Grandparent i) Other If **Other**, specify: \_\_\_\_\_

Site ID: Unique participant ID: 

**Before moving to the next question make sure the number reported in question 20b is consistent with the number of rows completed in question 21.**

**I would like to ask you some personal questions and reassure you that all your answers are confidential. If you feel uncomfortable to answer any question it is OK to say "I prefer not to answer" at any time and we will move on to the next question. We ask every participant in the study the same questions. By sharing this private information about your personal life you will help us to better understand whether Zika can be passed on through sex and when it is safe to have sex after having Zika disease. By sex I mean vaginal, anal, oral sex with another person.**

28. a) Have you had sexual relationship (vaginal, anal, oral) during the last 12 months?

1 = No

8 = Don't know

2 = Yes

9 = Refused

b) If **Yes**, do you use condom during your sexual relationship?

1 = No 2 = Yes

29. a) Are you and your sexual partner planning pregnancy?

1 = No

8 = don't know

2 = Yes

9 = Refused

b) Have you received information about the health consequences of Zika virus infection during pregnancy?

1 = No

8 = Don't know

2 = Yes

9 = Refused

30. Would you consider to abstain from sex while Zika outbreak is ongoing?

1 = No

8 = don't know

2 = Yes

9 = Refused

31. Currently do you have any of the following symptoms?

1 = No

8 = Don't know

2 = Yes

9 = Refused

a) Penile/urethral discharge f) Discharge or pain in the rectum b) Ulcers in genital or anal region g) Genital itching c) Lower abdominal pain h) Growth in genital or anal region d) Groin swelling i) Blood in your sperm e) Scrotal swelling j) Other If **Other**, specify: \_\_\_\_\_

## Enrollment questionnaire - Male

Site ID:   
(1 = Rio, 2 = Manaus, 3 = Recife)Unique participant ID: 32. a) Before today, did you receive information from anyone about when it is safe for someone who had Zika infection to have sex? 

- 1 = No  
2 = Yes
- 8 = Don't know  
9 = Refused

b) If **Yes**, from whom? 

- 1 = Friends or family members  
2 = Leaders in the community
- 3 = Public health or government officials  
4 = Other

If **Other**, specify: \_\_\_\_\_c) If **Yes**, what advice did you receive?

- 1 = No  
2 = Yes

1.a) = Someone who had Zika should abstain from having sex b) If **Yes**, ask for how longMonths 2. a) Sexual partner to use condom: b) If **Yes**, ask for how long (months): 3. It is safe to have sex intercourse immediately after Zika infection: 4. Any other advice: If **Other**, specify: \_\_\_\_\_**COMORBIDITIES*****Now I would like to ask you about health problems that you may have had in the past.***33. When was the last time that you saw a doctor? 

- 1 = In the last 12 months  
2 = Between 1 and 2 years  
3 = More than 2 years
- 4 = I never saw a doctor  
8 = Don't know  
9 = Refused

34. In general how would you classify your health status? 

- 1 = Very good  
2 = Good  
3 = Regular  
4 = Bad
- 5 = Very bad  
8 = Don't know  
9 = Refused
