# Supplementary material for: Study on the persistence of Zika virus (ZIKV) in body fluids of patients with ZIKV infection in Brazil
Source: Springer Nature journal article supplement (doi:10.1186/s12879-018-2965-4), 2018-01-22
Supplement: MOESM5 [file 15406428]

Site ID: 

(1 = Rio, 2 = Manaus, 3 = Recife)

Unique participant ID:

Participant type: 

(1 = Index, 2 = Contact symptomatic, 3 = Contact asymptomatic)

GAL number:

If Contact, number of Index

**ZIKA INFECTION CONVALESCENCE**

***Thank you for participating in the study. I will be conducting your interview today and it will last around 10 minutes. I ask all participants in this study the same questions. All of your answers are confidential. It is ok to say "I prefer not to answer" at any time and we will move on to the next question. You can also ask me to go back or repeat any question. I would like to remind you that your participation is completely confidential. Are you comfortable proceeding with the interview now?***

***I would like to talk to you about your health and wellbeing today after your recovery from Zika infection. (If asymptomatic case, skip to question 3)***

1. Compared to your last visit how is your overall health and well being? 

1 = The same as how I felt at my last study visit

8 = Don't know

2 = Worst than how I felt at my last study visit

9 = Refused

3 = Better than how I felt at my last study visit

2. a) After recovering from Zika do you have any new health problems? 

1 = No

8 = Don't know

2 = Yes

9 = Refused

b) If **Yes**, please, specify the problems you are experiencing:

1 = No

2 = Yes

1. General symptoms (fever, weight loss, loss of appetite, feeling tired) 2. Eye problems (itching, ocular redness, eye lid inflammation, blurred vision, loss of vision) 3. Joint problems 4. Abdominal pain 5. Headache 6. Neurological problems (loss of strength in the arms or legs, loss of balance) 7. Skin problems 8. Psychiatric/psychological problems (delusions, hallucinations, depression, anxiety) 9. Other If **Other**, specify: \_\_\_\_\_

## Follow up questionnaire - Male

Site ID: Unique participant ID: 3. a) After your last study visit have you been hospitalized? 

1 = No

8 = Don't know

2 = Yes

9 = Refused

If **No**, **Don't know** or **Refused**, Go to **Q4a**

b) What symptoms did you have? \_\_\_\_\_

c) What day did you go to the hospital?

| Day                  | Month                | Year                 |
|----------------------|----------------------|----------------------|
| <input type="text"/> | <input type="text"/> | <input type="text"/> |

d) How many days did you stay in the hospital?

Days 

e) What was the diagnosis? \_\_\_\_\_

f) What treatment did you receive? \_\_\_\_\_

4. a) After your last study visit has anyone in your home/sexual partner got Zika virus infection? 

1 = No

8 = Don't know

2 = Yes

9 = Refused

b) If **Yes**, can you tell me who are these persons?

Relationship

1 = No

2 = Yes

a) Husband f) Brother b) Wife g) Sister c) Sex; Sexual partner h) Grandparent d) Father i) Other e) Mother If **Other**, specify: \_\_\_\_\_5. After recovering from Zika, do you have the same level of sexual desire as before you were sick? **(If asymptomatic case, skip to question 6)**

1 = No

8 = Don't know

2 = Yes

9 = Refused

6. a) After you last study visit did you have sex? 

1 = No

8 = Don't know

2 = Yes

9 = Refused

b) If **Yes**, did you use condom during your last sex relationship? c) How many times did you have sex? 

1 = Every day

5 = Once per month

2 = 2 times a week

6 = Once

3 = 3 or more times a week

8 = Don't know

4 = Once per week

9 = Refused

## Follow up questionnaire - Male

Site ID: Unique participant ID: Participant type: GAL number: 

(1 = Index, 2 = Contact symptomatic, 3 = Contact asymptomatic)

## 7. Currently do you have any of the following symptoms?

1 = No

8 = Don't know

2 = Yes

9 = Refused

a) Penile/urethral discharge f) Discharge or pain in the rectum b) Ulcers in genital or anal region g) Genital itching c) Lower abdominal pain h) Growth in genital or anal region d) Groin swelling i) Blood in your sperm e) Scrotal swelling j) Other If **Other**, specify: \_\_\_\_\_

***Thank you very much for participating in the survey. Do you have any questions, comments or concerns about what we discussed today?***

Remarks: \_\_\_\_\_

\_\_\_\_\_

\_\_\_\_\_

Date MFU completed:

| Day                  | Month                | Year                 |
|----------------------|----------------------|----------------------|
| <input type="text"/> | <input type="text"/> | <input type="text"/> |

Signature: \_\_\_\_\_
