# Supplementary material for: Study on the persistence of Zika virus (ZIKV) in body fluids of patients with ZIKV infection in Brazil
Source: Springer Nature journal article supplement (doi:10.1186/s12879-018-2965-4), 2018-01-22
Supplement: MOESM6 [file 15406428]

Site ID:  Unique participant ID: 
  
(1 = Rio, 2 = Manaus, 3 = Recife)

Participant type:  GAL number: 
  
(1 = Index, 2 = Contact symptomatic, 3 = Contact asymptomatic)

If household contact/sexual partner, number of Index:

**VITAL SIGNS**

1. Date of first appointment 

| Day | Month | Year |
|-----|-------|------|
|     |       |      |

2. Main complaint \_\_\_\_\_

3. Date of first symptoms 

| Day | Month | Year |
|-----|-------|------|
|     |       |      |

4. a) Does the patient has fever? 
  
1 = No (*Skip to Q5*)    2 = Yes

b) Fever onset 
  
1 = sudden                      2 = gradual

c) Highest temperature measured so far                      °C ,

d) Current temperature                                              °C ,

e) Date of the end of fever 

| Day | Month | Year |
|-----|-------|------|
|     |       |      |

5. Heart rate per minute

6. Respiratory rate per minute

7. a) Blood pressure sitted (Systolic/Dyastolic)                      mmHg  /

b) Boood pressute lying down (Systolic/Dyastolic)                      mmHg  /

8. Weight                                                                                              Kg ,

9. Height                                                                                              m ,

Site ID:

Unique participant ID:

**SYMPTOMS**

1 = No

2 = Yes

10. a) Chill

b) Date of onset

| Day                  | Month                | Year                 |
|----------------------|----------------------|----------------------|
| <input type="text"/> | <input type="text"/> | <input type="text"/> |

| Day                  | Month                | Year                 |
|----------------------|----------------------|----------------------|
| <input type="text"/> | <input type="text"/> | <input type="text"/> |

11. a) Headache

b) Date of onset

| Day                  | Month                | Year                 |
|----------------------|----------------------|----------------------|
| <input type="text"/> | <input type="text"/> | <input type="text"/> |

| Day                  | Month                | Year                 |
|----------------------|----------------------|----------------------|
| <input type="text"/> | <input type="text"/> | <input type="text"/> |

12. a) Photophobia

b) Date of onset

| Day                  | Month                | Year                 |
|----------------------|----------------------|----------------------|
| <input type="text"/> | <input type="text"/> | <input type="text"/> |

| Day                  | Month                | Year                 |
|----------------------|----------------------|----------------------|
| <input type="text"/> | <input type="text"/> | <input type="text"/> |

13. a) Retro orbital pain

b) Date of onset

| Day                  | Month                | Year                 |
|----------------------|----------------------|----------------------|
| <input type="text"/> | <input type="text"/> | <input type="text"/> |

| Day                  | Month                | Year                 |
|----------------------|----------------------|----------------------|
| <input type="text"/> | <input type="text"/> | <input type="text"/> |

14. a) Ocular burning sensation

b) Date of onset

| Day                  | Month                | Year                 |
|----------------------|----------------------|----------------------|
| <input type="text"/> | <input type="text"/> | <input type="text"/> |

| Day                  | Month                | Year                 |
|----------------------|----------------------|----------------------|
| <input type="text"/> | <input type="text"/> | <input type="text"/> |

15. a) Oropharyngeal pain

b) Date of onset

| Day                  | Month                | Year                 |
|----------------------|----------------------|----------------------|
| <input type="text"/> | <input type="text"/> | <input type="text"/> |

| Day                  | Month                | Year                 |
|----------------------|----------------------|----------------------|
| <input type="text"/> | <input type="text"/> | <input type="text"/> |

16. a) Hoarseness

b) Date of onset

| Day                  | Month                | Year                 |
|----------------------|----------------------|----------------------|
| <input type="text"/> | <input type="text"/> | <input type="text"/> |

| Day                  | Month                | Year                 |
|----------------------|----------------------|----------------------|
| <input type="text"/> | <input type="text"/> | <input type="text"/> |

17. a) Change in taste

b) Date of onset

| Day | Month | Year |
|-----|-------|------|
|     |       |      |

| Day | Month | Year |
|-----|-------|------|
|     |       |      |

Symptoms/Signs  
version 1.1  
12/set/16

Persistence of Zika virus in body fluids of patients with  
Zika virus infection  
Consultation form - 1st consult

CON1  
Page 3/8  
v1.1(12/09/2016)

Site ID:

Unique participant ID:

18. a) Earache

b) Date of onset

| Day | Month | Year |
|-----|-------|------|
|     |       |      |

| Day | Month | Year |
|-----|-------|------|
|     |       |      |

19. a) Coryza

b) Date of onset

| Day | Month | Year |
|-----|-------|------|
|     |       |      |

| Day | Month | Year |
|-----|-------|------|
|     |       |      |

20. a) Nasal congestion

b) Date of onset

| Day | Month | Year |
|-----|-------|------|
|     |       |      |

| Day | Month | Year |
|-----|-------|------|
|     |       |      |

21. a) Sudoresis

b) Date of onset

| Day | Month | Year |
|-----|-------|------|
|     |       |      |

| Day | Month | Year |
|-----|-------|------|
|     |       |      |

22. a) Prostration

b) Date of onset

| Day | Month | Year |
|-----|-------|------|
|     |       |      |

| Day | Month | Year |
|-----|-------|------|
|     |       |      |

23. a) Myalgia

b) Date of onset

| Day | Month | Year |
|-----|-------|------|
|     |       |      |

| Day | Month | Year |
|-----|-------|------|
|     |       |      |

24. a) Lombalgia

b) Date of onset

| Day | Month | Year |
|-----|-------|------|
|     |       |      |

| Day | Month | Year |
|-----|-------|------|
|     |       |      |

25. a) Muscular weakness

b) Date of onset

| Day |  |  | Month |  |  | Year |  |  |
|-----|--|--|-------|--|--|------|--|--|
|     |  |  |       |  |  |      |  |  |

| Day |  |  | Month |  |  | Year |  |  |
|-----|--|--|-------|--|--|------|--|--|
|     |  |  |       |  |  |      |  |  |

Symptoms/Signs  
version 1.1  
12/set/16

Persistence of Zika virus in body fluids of patients with  
Zika virus infection  
Consultation form - 1st consult

CON1  
Page 4/8  
v1.1(12/09/2016)

Site ID:

Unique participant ID:

26. a) Arthralgia

b) Date of onset

| Day |  |  | Month |  |  | Year |  |  |
|-----|--|--|-------|--|--|------|--|--|
|     |  |  |       |  |  |      |  |  |

| Day |  |  | Month |  |  | Year |  |  |
|-----|--|--|-------|--|--|------|--|--|
|     |  |  |       |  |  |      |  |  |

d) Site of arthralgia

1. Shoulder

4. hip

2. Elbow

5. Ankle

3. Knee

27. a) Anorexia

b) Date of onset

| Day |  |  | Month |  |  | Year |  |  |
|-----|--|--|-------|--|--|------|--|--|
|     |  |  |       |  |  |      |  |  |

| Day |  |  | Month |  |  | Year |  |  |
|-----|--|--|-------|--|--|------|--|--|
|     |  |  |       |  |  |      |  |  |

28. a) Nausea

b) Date of onset

| Day |  |  | Month |  |  | Year |  |  |
|-----|--|--|-------|--|--|------|--|--|
|     |  |  |       |  |  |      |  |  |

| Day |  |  | Month |  |  | Year |  |  |
|-----|--|--|-------|--|--|------|--|--|
|     |  |  |       |  |  |      |  |  |

29. a) Vomit

b) Date of onset

| Day |  |  | Month |  |  | Year |  |  |
|-----|--|--|-------|--|--|------|--|--|
|     |  |  |       |  |  |      |  |  |

| Day |  |  | Month |  |  | Year |  |  |
|-----|--|--|-------|--|--|------|--|--|
|     |  |  |       |  |  |      |  |  |

30. a) Abdominal pain

b) Date of onset

| Day |  |  | Month |  |  | Year |  |  |
|-----|--|--|-------|--|--|------|--|--|
|     |  |  |       |  |  |      |  |  |

| Day |  |  | Month |  |  | Year |  |  |
|-----|--|--|-------|--|--|------|--|--|
|     |  |  |       |  |  |      |  |  |

31. a) Choluria

b) Date of onset

| Day | Month | Year |
|-----|-------|------|
|     |       |      |

| Day | Month | Year |
|-----|-------|------|
|     |       |      |

32. a) Dysuria

b) Date of onset

| Day | Month | Year |
|-----|-------|------|
|     |       |      |

| Day | Month | Year |
|-----|-------|------|
|     |       |      |

Symptoms/Signs  
version 1.1  
12/set/16

Persistence of Zika virus in body fluids of patients with  
Zika virus infection  
Consultation form - 1st consult

CON1  
Page 5/8  
v1.1(12/09/2016)

Site ID:

Unique participant ID:

33. a) Dyarrhoea

b) Date of onset

| Day | Month | Year |
|-----|-------|------|
|     |       |      |

| Day | Month | Year |
|-----|-------|------|
|     |       |      |

34. a) Dyspnoea

b) Date of onset

| Day | Month | Year |
|-----|-------|------|
|     |       |      |

| Day | Month | Year |
|-----|-------|------|
|     |       |      |

35. a) Cough

b) Date of onset

| Day | Month | Year |
|-----|-------|------|
|     |       |      |

| Day | Month | Year |
|-----|-------|------|
|     |       |      |

36. a) Haemorrhage

b) Date of onset

| Day | Month | Year |
|-----|-------|------|
|     |       |      |

| Day | Month | Year |
|-----|-------|------|
|     |       |      |

37. a) Epistaxe

b) Date of onset

| Day | Month | Year |
|-----|-------|------|
|     |       |      |

| Day | Month | Year |
|-----|-------|------|
|     |       |      |

38. a) Gum bleeding

b) Date of onset

| Day | Month | Year |
|-----|-------|------|
|     |       |      |

| Day | Month | Year |
|-----|-------|------|
|     |       |      |

39. a) Metrorrhagia

b) Date of onset

| Day | Month | Year |
|-----|-------|------|
|     |       |      |

| Day | Month | Year |
|-----|-------|------|
|     |       |      |

|  |  |  |  |  |  |  |  |  |  |
|--|--|--|--|--|--|--|--|--|--|
|  |  |  |  |  |  |  |  |  |  |
|--|--|--|--|--|--|--|--|--|--|

|  |  |  |  |  |  |  |  |  |  |
|--|--|--|--|--|--|--|--|--|--|
|  |  |  |  |  |  |  |  |  |  |
|--|--|--|--|--|--|--|--|--|--|

40. a) Hematuria

b) Date of onset

| Day | Month | Year |
|-----|-------|------|
|     |       |      |

| Day | Month | Year |
|-----|-------|------|
|     |       |      |

Symptoms/Signs  
version 1.1  
12/set/16

Persistence of Zika virus in body fluids of patients with  
Zika virus infection  
Consultation form - 1st consult

CON1  
Page 6/8  
v1.1(12/09/2016)

Site ID:

Unique participant ID:

|  |  |  |  |
|--|--|--|--|
|  |  |  |  |
|--|--|--|--|

41. a) Hematemesis

b) Date of onset

| Day | Month | Year |
|-----|-------|------|
|     |       |      |

| Day | Month | Year |
|-----|-------|------|
|     |       |      |

42. a) Melena

b) Date of onset

| Day | Month | Year |
|-----|-------|------|
|     |       |      |

| Day | Month | Year |
|-----|-------|------|
|     |       |      |

43. a) Hemoptysis

b) Date of onset

| Day | Month | Year |
|-----|-------|------|
|     |       |      |

| Day | Month | Year |
|-----|-------|------|
|     |       |      |

44. a) Erythema

b) Date of onset

| Day | Month | Year |
|-----|-------|------|
|     |       |      |

| Day | Month | Year |
|-----|-------|------|
|     |       |      |

45. a) Exanthema

b) Date of onset

| Day | Month | Year |
|-----|-------|------|
|     |       |      |

| Day | Month | Year |
|-----|-------|------|
|     |       |      |

46. a) Pruritus

b) Date of onset

| Day | Month | Year |
|-----|-------|------|
|     |       |      |

| Day | Month | Year |
|-----|-------|------|
|     |       |      |

47. a) Numbness in the extremities

b) Date of onset

| Day | Month | Year |
|-----|-------|------|
|     |       |      |

| Day | Month | Year |
|-----|-------|------|
|     |       |      |

48. a) Edema

b) Date of onset

| Day | Month | Year |
|-----|-------|------|
|     |       |      |

| Day | Month | Year |
|-----|-------|------|
|     |       |      |

Symptoms/Signs  
version 1.1  
12/set/16

Persistence of Zika virus in body fluids of patients with  
Zika virus infection  
Consultation form - 1st consult

CON1  
Page 7/8  
v1.1(12/09/2016)

Site ID:

Unique participant ID:

49. a) Any medicine for this infection up to now?

b) If yes, please, give details

\_\_\_\_\_

\_\_\_\_\_

EXAMINATION

1 = No

2 = Yes

50. Capillary refill

51. Filiform pulse

52. Cold extremities

53. Hypotension/shock

54. Dyspnoea

55. Dehydration

56. Pale skin/mucosa

57. Edema

58. Jaundice

59. Oropharyngeal hyperemia

- |                        |                          |                    |                          |
|------------------------|--------------------------|--------------------|--------------------------|
| 60. a) Lymphadenopathy | <input type="checkbox"/> | e) Supraclavicular | <input type="checkbox"/> |
| b) Cervical            | <input type="checkbox"/> | f) Axillar         | <input type="checkbox"/> |
| c) Retro auricular     | <input type="checkbox"/> | g) Epitroclear     | <input type="checkbox"/> |
| d) Occipital           | <input type="checkbox"/> | h) Inguinal        | <input type="checkbox"/> |

|                                                     |                                                                                                                               |                                               |
|-----------------------------------------------------|-------------------------------------------------------------------------------------------------------------------------------|-----------------------------------------------|
| <b>Symptoms/Signs<br/>version 1.1<br/>12/set/16</b> | <b>Persistence of Zika virus in body fluids of patients with<br/>Zika virus infection<br/>Consultation form - 1st consult</b> | <b>CON1<br/>Page 8/8<br/>v1.1(12/09/2016)</b> |
|-----------------------------------------------------|-------------------------------------------------------------------------------------------------------------------------------|-----------------------------------------------|

Site ID:  Unique participant ID:

- |                   |                          |              |                          |
|-------------------|--------------------------|--------------|--------------------------|
| 61. a) Exanthema  | <input type="checkbox"/> | e) Erythema  | <input type="checkbox"/> |
| b) Macular        | <input type="checkbox"/> | f) Enanthema | <input type="checkbox"/> |
| c) Maculo-papular | <input type="checkbox"/> | g) Other     | <input type="checkbox"/> |
| d) Vesiculosus    | <input type="checkbox"/> |              |                          |

62. Haemorrhage

63. Petechia

64. Purpura

65. Gum bleeding

66. Epistaxe

|                              |                          |                    |                          |
|------------------------------|--------------------------|--------------------|--------------------------|
| 67. a) Cardiac abnormalities | <input type="checkbox"/> | d) Coarse crackles | <input type="checkbox"/> |
|------------------------------|--------------------------|--------------------|--------------------------|

|           |                          |            |                          |
|-----------|--------------------------|------------|--------------------------|
| b) Murmur | <input type="checkbox"/> | e) Wheezes | <input type="checkbox"/> |
|-----------|--------------------------|------------|--------------------------|

|                  |                          |  |  |
|------------------|--------------------------|--|--|
| c) Fine crackles | <input type="checkbox"/> |  |  |
|------------------|--------------------------|--|--|

|                               |                          |                 |                          |
|-------------------------------|--------------------------|-----------------|--------------------------|
| 68. a) Abdomial abnormalities | <input type="checkbox"/> | d) Hepatomegaly | <input type="checkbox"/> |
|-------------------------------|--------------------------|-----------------|--------------------------|

|                      |                          |                 |                          |
|----------------------|--------------------------|-----------------|--------------------------|
| b) Pain on palpation | <input type="checkbox"/> | e) Splenomegaly | <input type="checkbox"/> |
|----------------------|--------------------------|-----------------|--------------------------|

|            |                          |  |  |
|------------|--------------------------|--|--|
| c) Ascitis | <input type="checkbox"/> |  |  |
|------------|--------------------------|--|--|



69. Neurological abnormalities

b) Lethargy

c) Agitation

d) Other

Please, specify \_\_\_\_\_

70. a) Rheumatological abnormalities

b) Edema

c) Other  Please, specify
