# Supplementary material for: Study on the persistence of Zika virus (ZIKV) in body fluids of patients with ZIKV infection in Brazil
Source: Springer Nature journal article supplement (doi:10.1186/s12879-018-2965-4), 2018-01-22
Supplement: MOESM7 [file 15406428]

|                                                                                                                                                                                                                                                                                       |                                                                                                                                                                                                                                                                                                                                                                                                                                                                                                                                                                                                                                                                                                                                                                     |
|---------------------------------------------------------------------------------------------------------------------------------------------------------------------------------------------------------------------------------------------------------------------------------------|---------------------------------------------------------------------------------------------------------------------------------------------------------------------------------------------------------------------------------------------------------------------------------------------------------------------------------------------------------------------------------------------------------------------------------------------------------------------------------------------------------------------------------------------------------------------------------------------------------------------------------------------------------------------------------------------------------------------------------------------------------------------|
| Site ID: <input style="width: 20px; height: 20px;" type="checkbox"/><br>(1 = Rio, 2 = Manaus, 3 = Recife)                                                                                                                                                                             | Unique participant ID: <input style="width: 20px; height: 20px;" type="text"/>                                                                                                                                                                                                                                                                                                                                                                                                                                                                                                              |
| Participant type: <input style="width: 20px; height: 20px;" type="checkbox"/><br>(1 = Index, 2 = Contact symptomatic, 3 = Contact asymptomatic)                                                                                                                                       | GAL number: <input style="width: 20px; height: 20px;" type="text"/> |
| If household contact/sexual partner, number of Index: <input style="width: 20px; height: 20px;" type="text"/> |                                                                                                                                                                                                                                                                                                                                                                                                                                                                                                                                                                                                                                                                                                                                                                     |

**VITAL SIGNS**

| 1. Date of second appointment                    | <table border="1" style="width: 100%; border-collapse: collapse; text-align: center;"> <tr><th style="width: 33%;">Day</th><th style="width: 33%;">Month</th><th style="width: 33%;">Year</th></tr> <tr><td style="width: 33px; height: 20px;"></td><td style="width: 33px; height: 20px;"></td><td style="width: 33px; height: 20px;"></td></tr> </table> | Day  | Month | Year |  |  |  |
|--------------------------------------------------|------------------------------------------------------------------------------------------------------------------------------------------------------------------------------------------------------------------------------------------------------------------------------------------------------------------------------------------------------------|------|-------|------|--|--|--|
| Day                                              | Month                                                                                                                                                                                                                                                                                                                                                      | Year |       |      |  |  |  |
|                                                  |                                                                                                                                                                                                                                                                                                                                                            |      |       |      |  |  |  |
| 2. a) Highest temperature measured so far        | °C <input style="width: 20px; height: 20px;" type="text"/> <input style="width: 20px; height: 20px;" type="text"/> , <input style="width: 20px; height: 20px;" type="text"/>                                                                                                                                                                               |      |       |      |  |  |  |
| b) Current temperature                           | °C <input style="width: 20px; height: 20px;" type="text"/> <input style="width: 20px; height: 20px;" type="text"/> , <input style="width: 20px; height: 20px;" type="text"/>                                                                                                                                                                               |      |       |      |  |  |  |
| c) Date of the end of fever                      | <table border="1" style="width: 100%; border-collapse: collapse; text-align: center;"> <tr><th style="width: 33%;">Day</th><th style="width: 33%;">Month</th><th style="width: 33%;">Year</th></tr> <tr><td style="width: 33px; height: 20px;"></td><td style="width: 33px; height: 20px;"></td><td style="width: 33px; height: 20px;"></td></tr> </table> | Day  | Month | Year |  |  |  |
| Day                                              | Month                                                                                                                                                                                                                                                                                                                                                      | Year |       |      |  |  |  |
|                                                  |                                                                                                                                                                                                                                                                                                                                                            |      |       |      |  |  |  |
| 3. Heart rate per minute                         | <input style="width: 20px; height: 20px;" type="text"/> <input style="width: 20px; height: 20px;" type="text"/> <input style="width: 20px; height: 20px;" type="text"/>                                                                                                                                                                                    |      |       |      |  |  |  |
| 4. Respiratory rate per minute                   | <input style="width: 20px; height: 20px;" type="text"/> <input style="width: 20px; height: 20px;" type="text"/>                                                                                                                                                                                                                                            |      |       |      |  |  |  |
| 5. a) Blood pressure sitted (Systolic/Dyastolic) | mmHg <input style="width: 20px; height: 20px;" type="text"/> <input style="width: 20px; height: 20px;" type="text"/> / <input style="width: 20px; height: 20px;" type="text"/> <input style="width: 20px; height: 20px;" type="text"/>                                                                                                                     |      |       |      |  |  |  |
| b) Bood pressute lying down (Systolic/Dyastolic) | mmHg <input style="width: 20px; height: 20px;" type="text"/> <input style="width: 20px; height: 20px;" type="text"/> / <input style="width: 20px; height: 20px;" type="text"/> <input style="width: 20px; height: 20px;" type="text"/>                                                                                                                     |      |       |      |  |  |  |
| 6. Weight                                        | Kg <input style="width: 20px; height: 20px;" type="text"/> <input style="width: 20px; height: 20px;" type="text"/> , <input style="width: 20px; height: 20px;" type="text"/>                                                                                                                                                                               |      |       |      |  |  |  |
| 7. Height                                        | m <input style="width: 20px; height: 20px;" type="text"/> , <input style="width: 20px; height: 20px;" type="text"/> <input style="width: 20px; height: 20px;" type="text"/>                                                                                                                                                                                |      |       |      |  |  |  |

**SYMPTOMS**

| 1 = No           | 2 = Yes                                                                                                                                                                                                                                                                                                                                                    |      |       |      |  |  |  |                |                                                                                                                                                                                                                                                                                                                                                            |     |       |      |  |  |  |
|------------------|------------------------------------------------------------------------------------------------------------------------------------------------------------------------------------------------------------------------------------------------------------------------------------------------------------------------------------------------------------|------|-------|------|--|--|--|----------------|------------------------------------------------------------------------------------------------------------------------------------------------------------------------------------------------------------------------------------------------------------------------------------------------------------------------------------------------------------|-----|-------|------|--|--|--|
| 8. a) Chill      | <input style="width: 20px; height: 20px;" type="checkbox"/>                                                                                                                                                                                                                                                                                                |      |       |      |  |  |  |                |                                                                                                                                                                                                                                                                                                                                                            |     |       |      |  |  |  |
| b) Date of onset | <table border="1" style="width: 100%; border-collapse: collapse; text-align: center;"> <tr><th style="width: 33%;">Day</th><th style="width: 33%;">Month</th><th style="width: 33%;">Year</th></tr> <tr><td style="width: 33px; height: 20px;"></td><td style="width: 33px; height: 20px;"></td><td style="width: 33px; height: 20px;"></td></tr> </table> | Day  | Month | Year |  |  |  | c) Date of end | <table border="1" style="width: 100%; border-collapse: collapse; text-align: center;"> <tr><th style="width: 33%;">Day</th><th style="width: 33%;">Month</th><th style="width: 33%;">Year</th></tr> <tr><td style="width: 33px; height: 20px;"></td><td style="width: 33px; height: 20px;"></td><td style="width: 33px; height: 20px;"></td></tr> </table> | Day | Month | Year |  |  |  |
| Day              | Month                                                                                                                                                                                                                                                                                                                                                      | Year |       |      |  |  |  |                |                                                                                                                                                                                                                                                                                                                                                            |     |       |      |  |  |  |
|                  |                                                                                                                                                                                                                                                                                                                                                            |      |       |      |  |  |  |                |                                                                                                                                                                                                                                                                                                                                                            |     |       |      |  |  |  |
| Day              | Month                                                                                                                                                                                                                                                                                                                                                      | Year |       |      |  |  |  |                |                                                                                                                                                                                                                                                                                                                                                            |     |       |      |  |  |  |
|                  |                                                                                                                                                                                                                                                                                                                                                            |      |       |      |  |  |  |                |                                                                                                                                                                                                                                                                                                                                                            |     |       |      |  |  |  |
| 9. a) Headache   | <input style="width: 20px; height: 20px;" type="checkbox"/>                                                                                                                                                                                                                                                                                                |      |       |      |  |  |  |                |                                                                                                                                                                                                                                                                                                                                                            |     |       |      |  |  |  |
| b) Date of onset | <table border="1" style="width: 100%; border-collapse: collapse; text-align: center;"> <tr><th style="width: 33%;">Day</th><th style="width: 33%;">Month</th><th style="width: 33%;">Year</th></tr> <tr><td style="width: 33px; height: 20px;"></td><td style="width: 33px; height: 20px;"></td><td style="width: 33px; height: 20px;"></td></tr> </table> | Day  | Month | Year |  |  |  | c) Date of end | <table border="1" style="width: 100%; border-collapse: collapse; text-align: center;"> <tr><th style="width: 33%;">Day</th><th style="width: 33%;">Month</th><th style="width: 33%;">Year</th></tr> <tr><td style="width: 33px; height: 20px;"></td><td style="width: 33px; height: 20px;"></td><td style="width: 33px; height: 20px;"></td></tr> </table> | Day | Month | Year |  |  |  |
| Day              | Month                                                                                                                                                                                                                                                                                                                                                      | Year |       |      |  |  |  |                |                                                                                                                                                                                                                                                                                                                                                            |     |       |      |  |  |  |
|                  |                                                                                                                                                                                                                                                                                                                                                            |      |       |      |  |  |  |                |                                                                                                                                                                                                                                                                                                                                                            |     |       |      |  |  |  |
| Day              | Month                                                                                                                                                                                                                                                                                                                                                      | Year |       |      |  |  |  |                |                                                                                                                                                                                                                                                                                                                                                            |     |       |      |  |  |  |
|                  |                                                                                                                                                                                                                                                                                                                                                            |      |       |      |  |  |  |                |                                                                                                                                                                                                                                                                                                                                                            |     |       |      |  |  |  |

Site ID:

Unique participant ID:

10. a) Photophobia

b) Date of onset

| Day                  | Month                | Year                 |
|----------------------|----------------------|----------------------|
| <input type="text"/> | <input type="text"/> | <input type="text"/> |

c) Date of end

| Day                  | Month                | Year                 |
|----------------------|----------------------|----------------------|
| <input type="text"/> | <input type="text"/> | <input type="text"/> |

11. a) Retro orbital pain

b) Date of onset

| Day                  | Month                | Year                 |
|----------------------|----------------------|----------------------|
| <input type="text"/> | <input type="text"/> | <input type="text"/> |

c) Date of end

| Day                  | Month                | Year                 |
|----------------------|----------------------|----------------------|
| <input type="text"/> | <input type="text"/> | <input type="text"/> |

12. a) Ocular burning

b) Date of onset

| Day                  | Month                | Year                 |
|----------------------|----------------------|----------------------|
| <input type="text"/> | <input type="text"/> | <input type="text"/> |

c) Date of end

| Day                  | Month                | Year                 |
|----------------------|----------------------|----------------------|
| <input type="text"/> | <input type="text"/> | <input type="text"/> |

13. a) Oropharyngeal pain

b) Date of onset

| Day                  | Month                | Year                 |
|----------------------|----------------------|----------------------|
| <input type="text"/> | <input type="text"/> | <input type="text"/> |

c) Date of end

| Day                  | Month                | Year                 |
|----------------------|----------------------|----------------------|
| <input type="text"/> | <input type="text"/> | <input type="text"/> |

14. a) Hoarseness

b) Date of onset

| Day                  | Month                | Year                 |
|----------------------|----------------------|----------------------|
| <input type="text"/> | <input type="text"/> | <input type="text"/> |

c) Date of end

| Day                  | Month                | Year                 |
|----------------------|----------------------|----------------------|
| <input type="text"/> | <input type="text"/> | <input type="text"/> |

15. a) Change in taste

b) Date of onset

| Day                  | Month                | Year                 |
|----------------------|----------------------|----------------------|
| <input type="text"/> | <input type="text"/> | <input type="text"/> |

c) Date of end

| Day                  | Month                | Year                 |
|----------------------|----------------------|----------------------|
| <input type="text"/> | <input type="text"/> | <input type="text"/> |

16. a) Earache

b) Date of onset

| Day                  | Month                | Year                 |
|----------------------|----------------------|----------------------|
| <input type="text"/> | <input type="text"/> | <input type="text"/> |

c) Date of end

| Day                  | Month                | Year                 |
|----------------------|----------------------|----------------------|
| <input type="text"/> | <input type="text"/> | <input type="text"/> |

17. a) Coryza

b) Date of onset

| Day                  | Month                | Year                 |
|----------------------|----------------------|----------------------|
| <input type="text"/> | <input type="text"/> | <input type="text"/> |

c) Date of end

| Day                  | Month                | Year                 |
|----------------------|----------------------|----------------------|
| <input type="text"/> | <input type="text"/> | <input type="text"/> |

Site ID:

Unique participant ID:

18. a) Nasal congestion

b) Date of onset

| Day                  | Month                | Year                 |
|----------------------|----------------------|----------------------|
| <input type="text"/> | <input type="text"/> | <input type="text"/> |

c) Date of end

| Day                  | Month                | Year                 |
|----------------------|----------------------|----------------------|
| <input type="text"/> | <input type="text"/> | <input type="text"/> |

19. a) Sudoresis

b) Date of onset

| Day                  | Month                | Year                 |
|----------------------|----------------------|----------------------|
| <input type="text"/> | <input type="text"/> | <input type="text"/> |

c) Date of end

| Day                  | Month                | Year                 |
|----------------------|----------------------|----------------------|
| <input type="text"/> | <input type="text"/> | <input type="text"/> |

20. a) Prostration

b) Date of onset

| Day                  | Month                | Year                 |
|----------------------|----------------------|----------------------|
| <input type="text"/> | <input type="text"/> | <input type="text"/> |

c) Date of end

| Day                  | Month                | Year                 |
|----------------------|----------------------|----------------------|
| <input type="text"/> | <input type="text"/> | <input type="text"/> |

21. a) Myalgia

b) Date of onset

| Day                  | Month                | Year                 |
|----------------------|----------------------|----------------------|
| <input type="text"/> | <input type="text"/> | <input type="text"/> |

c) Date of end

| Day                  | Month                | Year                 |
|----------------------|----------------------|----------------------|
| <input type="text"/> | <input type="text"/> | <input type="text"/> |

22. a) Lombalgia

b) Date of onset

| Day                  | Month                | Year                 |
|----------------------|----------------------|----------------------|
| <input type="text"/> | <input type="text"/> | <input type="text"/> |

c) Date of end

| Day                  | Month                | Year                 |
|----------------------|----------------------|----------------------|
| <input type="text"/> | <input type="text"/> | <input type="text"/> |

23. a) Muscular weakness

b) Date of onset

| Day                  | Month                | Year                 |
|----------------------|----------------------|----------------------|
| <input type="text"/> | <input type="text"/> | <input type="text"/> |

c) Date of end

| Day                  | Month                | Year                 |
|----------------------|----------------------|----------------------|
| <input type="text"/> | <input type="text"/> | <input type="text"/> |

24. a) Arthralgia

b) Date of onset

| Day                  | Month                | Year                 |
|----------------------|----------------------|----------------------|
| <input type="text"/> | <input type="text"/> | <input type="text"/> |

c) Date of end

| Day                  | Month                | Year                 |
|----------------------|----------------------|----------------------|
| <input type="text"/> | <input type="text"/> | <input type="text"/> |

Site ID:

Unique participant ID:

d) Site of arthralgia

1. Shoulder

5. Small articulations

2. Elbow

6. Symetric

3. Knee

7. Migratory

4. hip

5. Ankle

25. a) Anorexia

b) Date of onset 

| Day                  | Month                | Year                 |
|----------------------|----------------------|----------------------|
| <input type="text"/> | <input type="text"/> | <input type="text"/> |

c) Date of end 

| Day                  | Month                | Year                 |
|----------------------|----------------------|----------------------|
| <input type="text"/> | <input type="text"/> | <input type="text"/> |

26. a) Nausea

b) Date of onset 

| Day                  | Month                | Year                 |
|----------------------|----------------------|----------------------|
| <input type="text"/> | <input type="text"/> | <input type="text"/> |

c) Date of end 

| Day                  | Month                | Year                 |
|----------------------|----------------------|----------------------|
| <input type="text"/> | <input type="text"/> | <input type="text"/> |

27. a) Vomit

b) Date of onset 

| Day                  | Month                | Year                 |
|----------------------|----------------------|----------------------|
| <input type="text"/> | <input type="text"/> | <input type="text"/> |

c) Date of end 

| Day                  | Month                | Year                 |
|----------------------|----------------------|----------------------|
| <input type="text"/> | <input type="text"/> | <input type="text"/> |

28. a) Abdominal pain

b) Date of onset 

| Day                  | Month                | Year                 |
|----------------------|----------------------|----------------------|
| <input type="text"/> | <input type="text"/> | <input type="text"/> |

c) Date of end 

| Day                  | Month                | Year                 |
|----------------------|----------------------|----------------------|
| <input type="text"/> | <input type="text"/> | <input type="text"/> |

29. a) Choluria

b) Date of onset 

| Day                  | Month                | Year                 |
|----------------------|----------------------|----------------------|
| <input type="text"/> | <input type="text"/> | <input type="text"/> |

c) Date of end 

| Day                  | Month                | Year                 |
|----------------------|----------------------|----------------------|
| <input type="text"/> | <input type="text"/> | <input type="text"/> |

30. a) Dysuria

b) Date of onset 

| Day                  | Month                | Year                 |
|----------------------|----------------------|----------------------|
| <input type="text"/> | <input type="text"/> | <input type="text"/> |

c) Date of end 

| Day                  | Month                | Year                 |
|----------------------|----------------------|----------------------|
| <input type="text"/> | <input type="text"/> | <input type="text"/> |

Site ID:

Unique participant ID:

31. a) Dyarrhoea

b) Date of onset

| Day                  | Month                | Year                 |
|----------------------|----------------------|----------------------|
| <input type="text"/> | <input type="text"/> | <input type="text"/> |

c) Date of end

| Day                  | Month                | Year                 |
|----------------------|----------------------|----------------------|
| <input type="text"/> | <input type="text"/> | <input type="text"/> |

32. a) Dyspnoea

b) Date of onset

| Day                  | Month                | Year                 |
|----------------------|----------------------|----------------------|
| <input type="text"/> | <input type="text"/> | <input type="text"/> |

c) Date of end

| Day                  | Month                | Year                 |
|----------------------|----------------------|----------------------|
| <input type="text"/> | <input type="text"/> | <input type="text"/> |

33. a) Cough

b) Date of onset

| Day                  | Month                | Year                 |
|----------------------|----------------------|----------------------|
| <input type="text"/> | <input type="text"/> | <input type="text"/> |

c) Date of end

| Day                  | Month                | Year                 |
|----------------------|----------------------|----------------------|
| <input type="text"/> | <input type="text"/> | <input type="text"/> |

34. a) Haemorrhage

b) Date of onset

| Day                  | Month                | Year                 |
|----------------------|----------------------|----------------------|
| <input type="text"/> | <input type="text"/> | <input type="text"/> |

c) Date of end

| Day                  | Month                | Year                 |
|----------------------|----------------------|----------------------|
| <input type="text"/> | <input type="text"/> | <input type="text"/> |

35. a) Epistaxe

b) Date of onset

| Day                  | Month                | Year                 |
|----------------------|----------------------|----------------------|
| <input type="text"/> | <input type="text"/> | <input type="text"/> |

c) Date of end

| Day                  | Month                | Year                 |
|----------------------|----------------------|----------------------|
| <input type="text"/> | <input type="text"/> | <input type="text"/> |

36. a) Gum bleeding

b) Date of onset

| Day                  | Month                | Year                 |
|----------------------|----------------------|----------------------|
| <input type="text"/> | <input type="text"/> | <input type="text"/> |

c) Date of end

| Day                  | Month                | Year                 |
|----------------------|----------------------|----------------------|
| <input type="text"/> | <input type="text"/> | <input type="text"/> |

37. a) Metrorrhagia

b) Date of onset

| Day                  | Month                | Year                 |
|----------------------|----------------------|----------------------|
| <input type="text"/> | <input type="text"/> | <input type="text"/> |

c) Date of end

| Day                  | Month                | Year                 |
|----------------------|----------------------|----------------------|
| <input type="text"/> | <input type="text"/> | <input type="text"/> |

38. a) Hematuria

b) Date of onset

| Day                  | Month                | Year                 |
|----------------------|----------------------|----------------------|
| <input type="text"/> | <input type="text"/> | <input type="text"/> |

c) Date of end

| Day                  | Month                | Year                 |
|----------------------|----------------------|----------------------|
| <input type="text"/> | <input type="text"/> | <input type="text"/> |

Site ID:

Unique participant ID:

39. a) Hematemesis

b) Date of onset

| Day                  | Month                | Year                 |
|----------------------|----------------------|----------------------|
| <input type="text"/> | <input type="text"/> | <input type="text"/> |

c) Date of end

| Day                  | Month                | Year                 |
|----------------------|----------------------|----------------------|
| <input type="text"/> | <input type="text"/> | <input type="text"/> |

40. a) Melena

b) Date of onset

| Day                  | Month                | Year                 |
|----------------------|----------------------|----------------------|
| <input type="text"/> | <input type="text"/> | <input type="text"/> |

c) Date of end

| Day                  | Month                | Year                 |
|----------------------|----------------------|----------------------|
| <input type="text"/> | <input type="text"/> | <input type="text"/> |

41. a) Hemoptysis

b) Date of onset

| Day                  | Month                | Year                 |
|----------------------|----------------------|----------------------|
| <input type="text"/> | <input type="text"/> | <input type="text"/> |

c) Date of end

| Day                  | Month                | Year                 |
|----------------------|----------------------|----------------------|
| <input type="text"/> | <input type="text"/> | <input type="text"/> |

42. a) Erythema

b) Date of onset

| Day                  | Month                | Year                 |
|----------------------|----------------------|----------------------|
| <input type="text"/> | <input type="text"/> | <input type="text"/> |

c) Date of end

| Day                  | Month                | Year                 |
|----------------------|----------------------|----------------------|
| <input type="text"/> | <input type="text"/> | <input type="text"/> |

43. a) Exanthema

b) Date of onset

| Day                  | Month                | Year                 |
|----------------------|----------------------|----------------------|
| <input type="text"/> | <input type="text"/> | <input type="text"/> |

c) Date of end

| Day                  | Month                | Year                 |
|----------------------|----------------------|----------------------|
| <input type="text"/> | <input type="text"/> | <input type="text"/> |

44. a) Pruritus

b) Date of onset

| Day                  | Month                | Year                 |
|----------------------|----------------------|----------------------|
| <input type="text"/> | <input type="text"/> | <input type="text"/> |

c) Date of end

| Day                  | Month                | Year                 |
|----------------------|----------------------|----------------------|
| <input type="text"/> | <input type="text"/> | <input type="text"/> |

45. a) Numbness in the extremities

b) Date of onset

| Day                  | Month                | Year                 |
|----------------------|----------------------|----------------------|
| <input type="text"/> | <input type="text"/> | <input type="text"/> |

c) Date of end

| Day                  | Month                | Year                 |
|----------------------|----------------------|----------------------|
| <input type="text"/> | <input type="text"/> | <input type="text"/> |

46. a) Edema

b) Date of onset

| Day                  | Month                | Year                 |
|----------------------|----------------------|----------------------|
| <input type="text"/> | <input type="text"/> | <input type="text"/> |

c) Date of end

| Day                  | Month                | Year                 |
|----------------------|----------------------|----------------------|
| <input type="text"/> | <input type="text"/> | <input type="text"/> |

Site ID:  Unique participant ID:

47. a) Any medicine for this infection up to now?

b) If yes, please, give details \_\_\_\_\_

**EXAMINATION**

1 = No (*Skip to the next*)      2 = Yes

- |                             |                          |                          |
|-----------------------------|--------------------------|--------------------------|
| 48. Capillary refill        |                          | <input type="checkbox"/> |
| 49. Filiform pulse          |                          | <input type="checkbox"/> |
| 50. Cold extremities        |                          | <input type="checkbox"/> |
| 51. Hypotension/shock       |                          | <input type="checkbox"/> |
| 52. Dyspnoea                |                          | <input type="checkbox"/> |
| 53. Dehydration             |                          | <input type="checkbox"/> |
| 54. Pale skin/mucosa        |                          | <input type="checkbox"/> |
| 55. Edema                   |                          | <input type="checkbox"/> |
| 56. Jaundice                |                          | <input type="checkbox"/> |
| 57. Oropharyngeal hyperemia |                          | <input type="checkbox"/> |
| 58. a) Lymphadenopathy      | <input type="checkbox"/> | e) Supraclavicular       |
| b) Cervical                 | <input type="checkbox"/> | f) Axilar                |
| c) Retro auricular          | <input type="checkbox"/> | g) Epitroclear           |
| d) Occipital                | <input type="checkbox"/> | h) Inguinal              |
| 59. a) Exanthema            | <input type="checkbox"/> | e) Erythema              |
| b) Macular                  | <input type="checkbox"/> | f) Enanthema             |
| c) Maculo-papular           | <input type="checkbox"/> | g) Other                 |
| d) Vesiculosus              | <input type="checkbox"/> |                          |

Site ID:

Unique participant ID:

60. Haemorrhage

61. Petechia

62. Purpura

63. Gum bleeding

64. Epistaxe

65. a) Cardiac abnormalities

b) Murmur

c) Fine crackles

66. a) Abdomial abnormalities

b) Pain on palpation

c) Ascitis

67. Neurological abnormalities

b) Lethargy

c) Agitation

d) Other

Please, specify \_\_\_\_\_

d) Coarse crackles

e) Wheezes

d) Hepatomegaly

e) Splenomegaly

68. a) Rheumatological abnormalities

b) Edema

c) Other

Please, specify \_\_\_\_\_
